# Supplementary material
Source: Springer Nature journal article supplement (https://www.springermedizin.de/resource/supplementary/12889_2013_6385_MOESM3_ESM.pdf/9497824)
Supplement: MOESM3 [file 9497824]

**Table 2. Summary of data used for the analysis**

| City                             | Improved WS        |                     | Water Collection Time   |                     | Improved San       |                     | OD Rates          |                     | City-Level Population Indices |                          |                                        | National-Level GDP         |                         | City-Level Education                           | Per Capita ODA for Large Scale WS & S | City-Level Flood Risk |
|----------------------------------|--------------------|---------------------|-------------------------|---------------------|--------------------|---------------------|-------------------|---------------------|-------------------------------|--------------------------|----------------------------------------|----------------------------|-------------------------|------------------------------------------------|---------------------------------------|-----------------------|
|                                  | Coverage Level (%) | Change (% per Year) | 30+ Mins Collection (%) | Change (% per Year) | Coverage Level (%) | Change (% per Year) | OD Prevalence (%) | Change (% per Year) | 2010 Pop. (x1000)             | Pop. Growth (% per year) | Pop. Density (People/km <sup>2</sup> ) | 2011 Per Capita GDP (US\$) | 2000-2011 Annual Growth | Heads of Household Completing Secondary School |                                       |                       |
| <i>Lagos, Nigeria</i>            | 90.2               | 0.14                | 13.4                    | -1.10               | 25.9               | 1.02                | 2.8               | -0.21               | 10578                         | 4.5                      | 12700                                  | 1502                       | 6.3                     | 75.17                                          | 0.35                                  | Very High             |
| <i>Kinshasa, DRC</i>             | 93.8               | -                   | -                       | -                   | 13.5               | -                   | 1.3               | -                   | 8754                          | 6.2                      | 15500                                  | 231                        | 4.2                     | 83.3                                           | 1.88                                  | High                  |
| <i>Luanda, Angola</i>            | 63.9               | 2.15                | -                       | -                   | ~                  | ~                   | 0.3               | -0.01               | 4772                          | 8.4                      | 10600                                  | 5318                       | 9.9                     | -                                              | 0.15                                  | High                  |
| <i>Abidjan, Cote d'Ivoire</i>    | 99.0               | 0.15                | -                       | -                   | 59.1               | -0.13               | 0.3               | -0.40               | 4125                          | 3.6                      | 13500                                  | 1195                       | 0.2                     | -                                              | 1.04                                  | High                  |
| <i>Nairobi, Kenya</i>            | 97.7               | 0.93                | 13.7                    | 0.37                | 50.1               | 2.84                | 0.3               | -0.46               | 3523                          | 5.9                      | 7500                                   | 808                        | 4                       | 76                                             | 4.57                                  | Very High             |
| <i>Kano, Nigeria</i>             | 73.6               | 1.82                | 28.9                    | 0.09                | 57.4               | 9.31                | 1.2               | 0.24                | 3395                          | 3.0                      | 15700                                  | 1502                       | 6.3                     | 45.03                                          | 0.35                                  | Very High             |
| <i>Dar es Salaam, Tanzania</i>   | 85.8               | 0.68                | 16.0                    | 0.54                | 19.6               | 1.49                | 0.0               | -0.05               | 3349                          | 4.3                      | 7100                                   | 532                        | 6.7                     | 30.09                                          | 5.24                                  | High                  |
| <i>Addis Ababa, Ethiopia</i>     | 99.9               | 0.02                | 28.5                    | 2.59                | 21.9               | 0.18                | 5.8               | 0.36                | 2930                          | 2.3                      | 9200                                   | 357                        | 8.3                     | 28.89                                          | 1.80                                  | Very High             |
| <i>Dakar, Senegal</i>            | 98.3               | 0.00                | 12.9                    | -1.87               | 59.6               | 2.78                | 0.5               | -0.16               | 2863                          | 4.1                      | 14900                                  | 1119                       | 4.1                     | 36.04                                          | 5.74                                  | High                  |
| <i>Ibadan, Nigeria</i>           | ~                  | ~                   | ~                       | ~                   | ~                  | ~                   | ~                 | ~                   | 2837                          | 2.7                      | 8400                                   | 1502                       | 6.3                     | -                                              | 0.35                                  | Very High             |
| <i>Accra, Ghana</i>              | 96.0               | -0.63               | 8.3                     | 0.75                | 25.6               | 0.94                | 1.2               | -0.95               | 2342                          | 4.0                      | 4100                                   | 1570                       | 6.3                     | 74.04                                          | 2.25                                  | Very High             |
| <i>Douala, Cameroon</i>          | 99.9               | 1.94                | 16.8                    | -2.28               | 53.1               | 2.88                | 0.6               | -0.03               | 2125                          | 4.3                      | 12700                                  | 1260                       | 3.4                     | 69.26                                          | 2.17                                  | Moderate              |
| <i>Abuja, Nigeria</i>            | 74.5               | -1.46               | 21.6                    | 4.32                | 44.2               | 5.20                | 16.0              | 3.20                | 1995                          | 13.9                     | 10000                                  | 1502                       | 6.3                     | 79.69                                          | 0.35                                  | High                  |
| <i>Ouagadougou, Burkina Faso</i> | 98.8               | 0.04                | 25.4                    | -2.24               | 57.1               | 1.94                | 2.6               | 0.07                | 1909                          | 10.7                     | 6000                                   | 600                        | 5.7                     | 37.21                                          | 5.26                                  | Very High             |
| <i>Antananarivo, Madagascar</i>  | 98.3               | 1.98                | 14.0                    | 0.28                | 19.6               | -1.86               | 1.1               | -0.31               | 1879                          | 2.9                      | 9100                                   | 465                        | 2.8                     | 72.54                                          | 0.64                                  | Very High             |
| <i>Kumasi, Ghana</i>             | 97.3               | 2.87                | 8.2                     | -0.78               | 12.5               | 0.97                | 3.7               | 0.05                | 1834                          | 5.5                      | 6500                                   | 1570                       | 6.3                     | 69.04                                          | 2.25                                  | High                  |
| <i>Yaounde, Cameroon</i>         | 88.6               | 0.41                | 43.3                    | 1.58                | 40.5               | 2.44                | 0.7               | -0.03               | 1801                          | 3.3                      | 12600                                  | 1260                       | 3.4                     | 63.86                                          | 2.18                                  | Moderate              |
| <i>Bamako, Mali</i>              | 95.4               | 1.20                | 9.0                     | -1.25               | 25.8               | 1.48                | 0.5               | 0.07                | 1699                          | 4.9                      | 6800                                   | 669                        | 5.2                     | 9.88                                           | 2.57                                  | High                  |
| <i>Maputo, Mozambique</i>        | 99.8               | 0.20                | -                       | -                   | ~                  | ~                   | 0.0               | -0.18               | 1655                          | 6.2                      | 7400                                   | 535                        | 7.2                     | 31                                             | 5.37                                  | High                  |
| <i>Conakry, Guinea</i>           | 95.2               | 0.02                | 11.0                    | 1.20                | 22.4               | 1.83                | 0.4               | -0.09               | 1653                          | 3.5                      | 11000                                  | 498                        | 2.8                     | 40.19                                          | 1.29                                  | Moderate              |
| <i>Harare, Zimbabwe</i>          | 95.6               | -0.69               | 24.8                    | -0.86               | 37.4               | -4.01               | 0.5               | 0.06                | 1632                          | 1.8                      | 2700                                   | 747                        | -3.3                    | 81.83                                          | 0.30                                  | High                  |
| <i>Kampala, Uganda</i>           | 92.8               | 0.13                | 11.0                    | -2.45               | 23.8               | 0.92                | 0.9               | 0.17                | 1598                          | 4.6                      | 3500                                   | 487                        | 7                       | 70.64                                          | 4.90                                  | Very High             |
| <i>Kaduna, Nigeria</i>           | 73.0               | -1.21               | 16.7                    | 1.91                | 28.9               | 3.45                | 9.2               | 1.84                | 1561                          | 3.2                      | 10200                                  | 1502                       | 6.3                     | 59.68                                          | 0.35                                  | Very High             |
| <i>Lumbumbashi, DRC</i>          | 87.2               | -                   | -                       | -                   | 18.5               | -                   | 7.0               | -                   | 1543                          | 6.1                      | 10500                                  | 231                        | 4.2                     | 67.72                                          | 1.88                                  | Moderate              |
| <i>Mbuji-Mayi, DRC</i>           | 90.6               | -                   | -                       | -                   | 31.8               | -                   | 2.7               | -                   | 1488                          | 6.7                      | 11700                                  | 231                        | 4.2                     | 63.51                                          | 1.88                                  | High                  |
| <i>Lusaka, Zambia</i>            | 97.0               | -0.64               | 8.4                     | -1.26               | 27.9               | 2.10                | 1.3               | 0.17                | 1451                          | 3.5                      | 8200                                   | 1425                       | 5.4                     | 63.97                                          | 3.54                                  | Very High             |
| <i>Brazzaville, Congo</i>        | 99.2               | 0.61                | -                       | -                   | 8.2                | -0.80               | 2.8               | 0.35                | 1323                          | 2.9                      | 10540                                  | 3485                       | 4.8                     | 80.95                                          | 2.20                                  | Moderate              |
| <i>Benin City, Nigeria</i>       | 92.9               | 4.67                | 14.4                    | -3.33               | 28.8               | 0.44                | 22.9              | 4.27                | 1302                          | 3.4                      | 6100                                   | 1502                       | 6.3                     | 68.32                                          | 0.35                                  | Moderate              |
| <i>Niamey, Niger</i>             | 93.9               | 3.60                | 9.4                     | -0.44               | ~                  | ~                   | 10.7              | 0.18                | 1048                          | 5.4                      | 8900                                   | 374                        | 3.8                     | 33.22                                          | 3.43                                  | Very High             |
| <i>Ogbomoshu, Nigeria</i>        | ~                  | ~                   | ~                       | ~                   | ~                  | ~                   | ~                 | ~                   | 1032                          | 2.9                      | 7600                                   | 1502                       | 6.3                     | -                                              | 0.35                                  | Very High             |
| <i>Mombasa, Kenya</i>            | 90.8               | 0.00                | 10.0                    | 1.11                | 30.1               | 2.60                | 2.2               | 0.00                | 1003                          | 4.7                      | 11900                                  | 808                        | 4                       | 64.72                                          | 4.57                                  | Very High             |
